# Supplementary material
Source: PubMed Central journal article supplement (PMC2757077)
Supplement: NIHMS129519-supplement-S2.pdf [file NIHMS129519-supplement-S2.pdf]

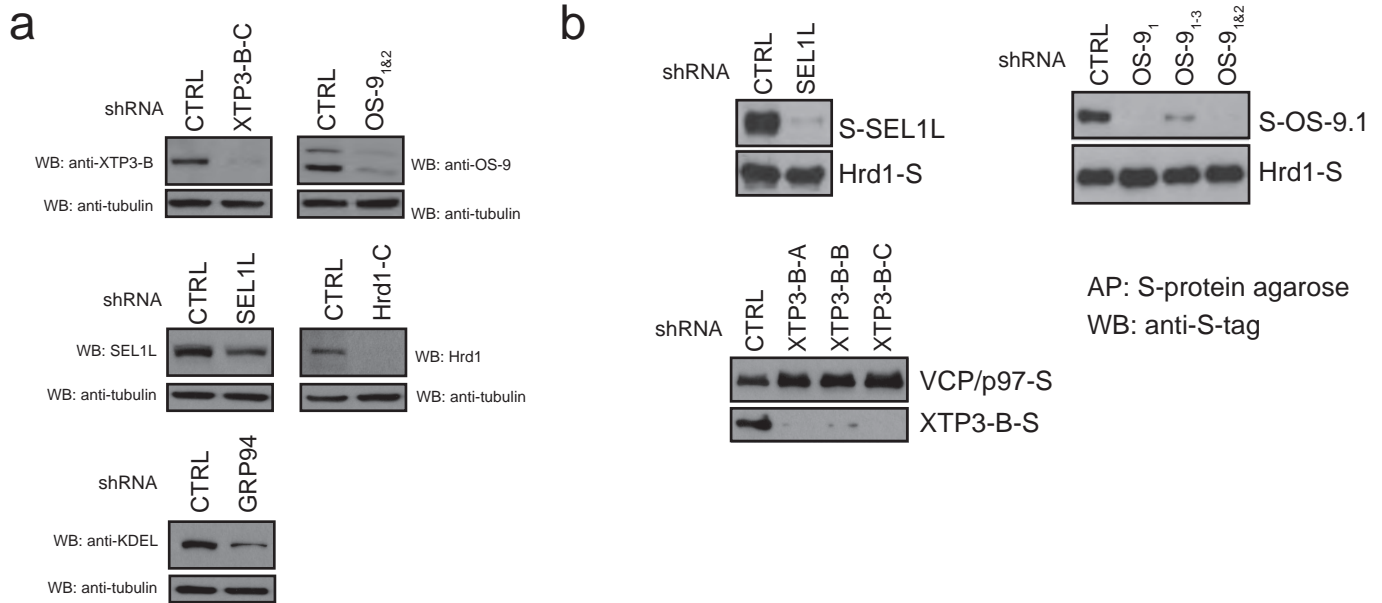

**Figure S2. Validation of knockdown specificity by shRNA.** (a) Lysates from HEK293 cells transiently expressing CTRL/GFP and shRNAs for XTP3-B-C, Hrd1-C, SEL1L, GRP94 and OS-9<sub>1&2</sub> were probed for specific immunoreactivity to their target, with tubulin western blots serving as the loading control. (b) shRNAs targeting indicated proteins were coexpressed with S-tagged versions of target proteins (Hrd1-S or VCP/p97-S). S-tagged proteins were affinity purified from lysates by S-protein agarose, separated by SDS-PAGE and immunoblots probed with anti-S-tag.
