# Supplementary material
Source: PubMed Central journal article supplement (PMC2757077)
Supplement: NIHMS129519-supplement-S3.pdf [file NIHMS129519-supplement-S3.pdf]

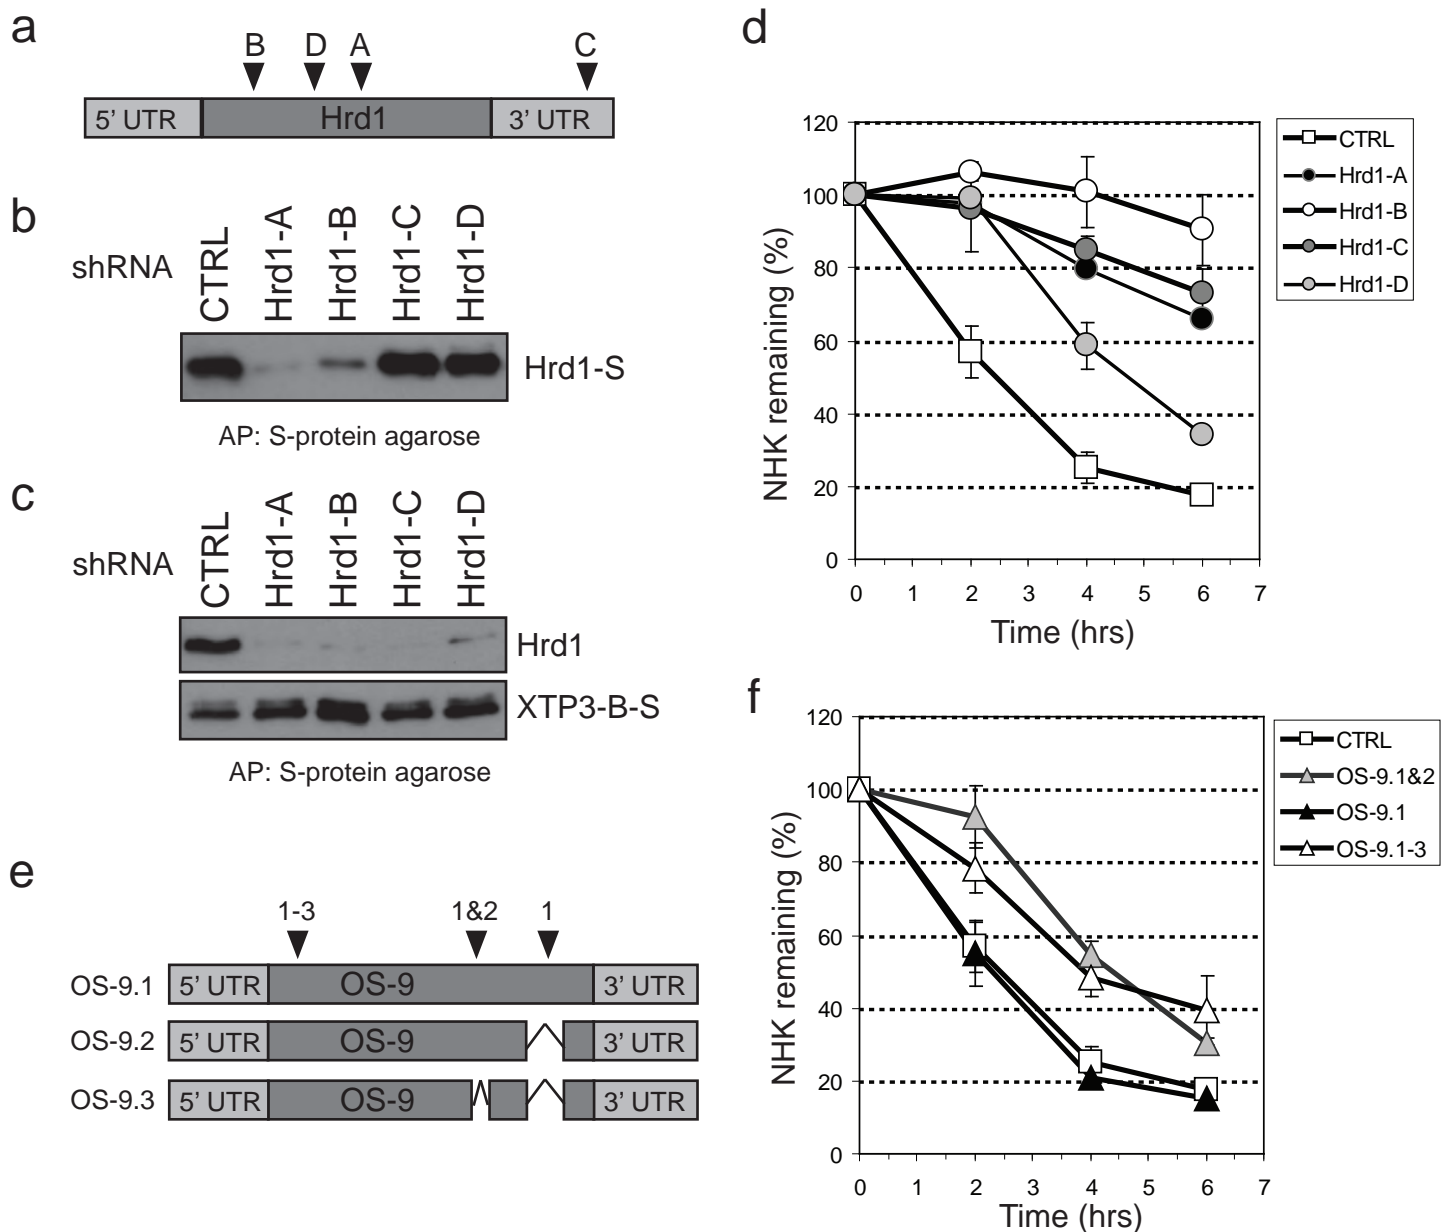

**Figure S3. Validation of shRNA knockdown for Hrd1 and OS-9.** (a) Schematic diagram depicting the location of shRNA targets for Hrd1. (b) Coexpression S-tagged Hrd1 with Hrd1 shRNA (A-D). Western blots were performed on S-agarose affinity purifies samples by anti-S-tag. (c) Coexpression S-tagged XTP3-B along with different Hrd1 shRNA (A-D). Affinity purified samples were probed for coprecipitation of Hrd1 and S-tag. (d) Composite data of pulse-chase assays for NHK-HA coexpressed with different Hrd1 shRNA (A-D) and CTRL/GFP shRNA. (e) Schematic diagram depicting the location of shRNA targets for OS-9. (f) Pulse-chase analysis of NHK-HA coexpressed with isoform-specific OS-9 shRNA (1&2, 1 and 1-3) and CTRL shRNA. For pulse-chase assays (d, f), data are shown as the mean and S.E.M. for 3 independent experiments.
