# Supplementary material
Source: PubMed Central journal article supplement (PMC2757077)
Supplement: NIHMS129519-supplement-S4.pdf [file NIHMS129519-supplement-S4.pdf]

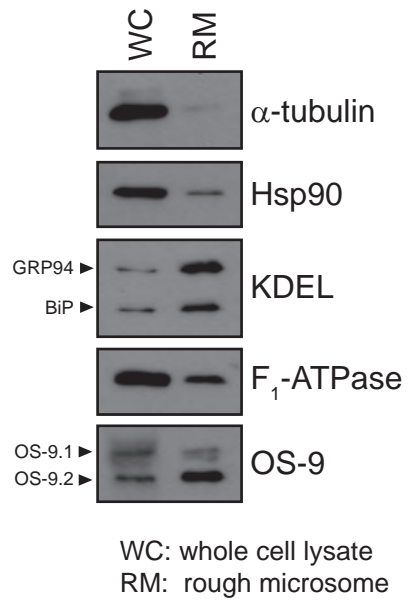

**Figure S4. Confirmation of ER enrichment in rough microsomal fractions.** Equal protein amounts of whole cell lysate (WC) and gradient-separated rough microsomal fractions (RM) were separated by SDS-PAGE. Western blots were probed with antibodies for the indicated markers of the cytoskeleton ( $\alpha$ -tubulin), cytosol (Hsp90), mitochondria (F<sub>1</sub>-ATPase) and ER (KDEL, OS-9).
