# Supplementary material
Source: PubMed Central journal article supplement (PMC2757077)

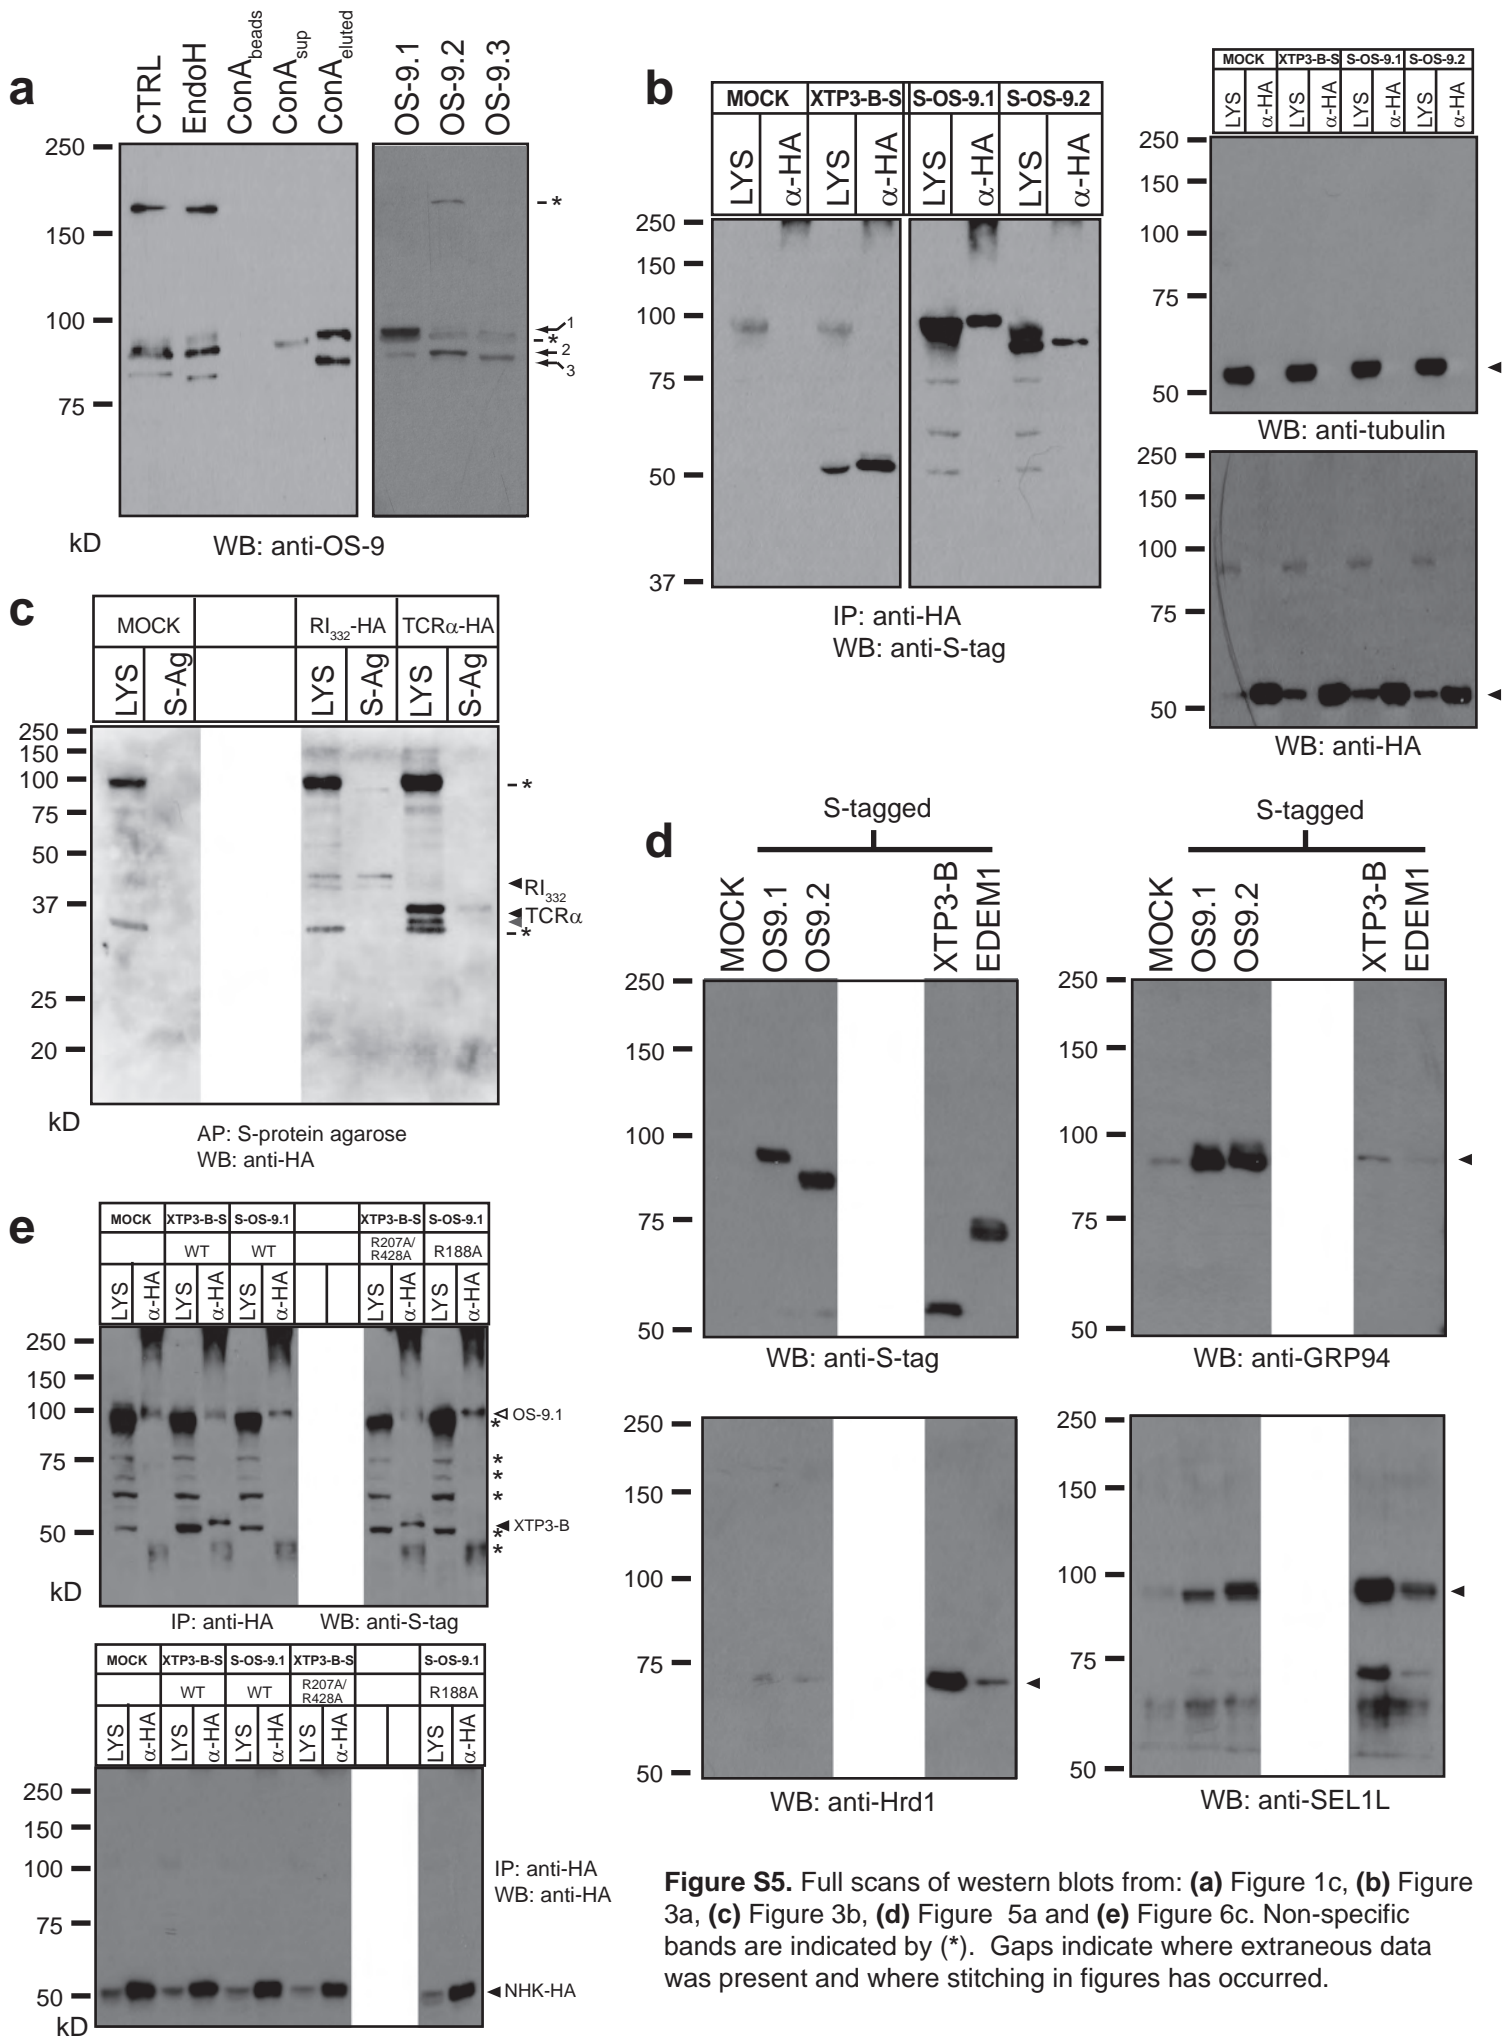

Supplement: NIHMS129519-supplement-S5.pdf [file NIHMS129519-supplement-S5.pdf]
